# Supplementary material for: Structured evaluation of stress triggers in prehospital emergency medical care
Source: Springer Nature journal article supplement (doi:10.1007/s00101-021-00968-x), 2021-05-11
Supplement: MOESM1 [file 19154180]

**Additional material to „Structured evaluation of stress trigger in prehospital medical care. An analysis by questionnaire regarding the professional groups”.**

**Eismann H., Sieg L., Palmaers T. et al. (2021) in *Der Anaesthetist*.**

Article and supplementary material are available at [www.springermedizin.de](http://www.springermedizin.de). Please enter the title of the article in the search field

**Stress factors of the professional group EMT-paramedic (“Rettungsassistent”)**

| Item number | Scale                    | Original item text (German)                                                                                                                             | Translated item text (English)                                                                                     |
|-------------|--------------------------|---------------------------------------------------------------------------------------------------------------------------------------------------------|--------------------------------------------------------------------------------------------------------------------|
| Q1          | Professional limitations | „Meinen gefühlten Stress in Rettungsdienst-Einsätzen bei Großschadenslagen (z.B. MANV) empfinde ich als...“                                             | "My perceived stress at rescue missions at mass-casualty incidents, I sense..."                                    |
| Q2          |                          | „Meinen gefühlten Stress in Rettungsdienst-Einsätzen mit fehlender Möglichkeit der Analgesie durch Rettungsdienstpersonal empfinde ich als...“          | "My perceived stress at rescue missions without the possibility of analgesia through EMS personnel, I sense..."    |
| Q3          |                          | „Meinen gefühlten Stress in Rettungsdienst-Einsätzen, bei denen man im Einsatz nicht mehr weiterweiß, empfinde ich als...“                              | "My perceived stress at rescue missions, where one feels helpless in the field, I sense..."                        |
| Q4          |                          | „Meinen gefühlten Stress in Rettungsdienst-Einsätzen mit eigenständigem Medikamenteneinsatz empfinde ich als...“                                        | "My perceived stress at rescue missions with self-contained use of medication, I sense..."                         |
| Q5          |                          | „Meinen gefühlten Stress in Rettungsdienst-Einsätzen mit der Anlage eines intraossären Zugangs empfinde ich als...“                                     | "My perceived stress at rescue missions with use of an intraosseous access, I sense..."                            |
| Q6          | Professional uncertainty | „Meinen gefühlten Stress in Rettungsdienst-Einsätzen bei der Durchführung von invasiven Maßnahmen bei nicht ganz klarer Indikation empfinde ich als...“ | "My perceived stress at rescue missions with execution of invasive procedures with a vague indication, I sense..." |
| Q7          |                          | „Meinen gefühlten Stress bei der Diagnosefindung in Rettungsdienst-Einsätzen bei unklaren Krankheitsbildern empfinde ich als...“                        | "My perceived stress at diagnosing vague clinical pictures during rescue missions, I sense..."                     |
| Q8          |                          | „Meinen gefühlten Stress in Rettungsdienst-Einsätzen mit seltenen Notfallbildern empfinde ich als...“                                                   | "My perceived stress at rescue missions with rare emergency situations, I sense..."                                |

|     |                                                                                                                                 |                                                                                                                             |                                                                                                                                     |
|-----|---------------------------------------------------------------------------------------------------------------------------------|-----------------------------------------------------------------------------------------------------------------------------|-------------------------------------------------------------------------------------------------------------------------------------|
| Q9  |                                                                                                                                 | „Meinen gefühlten Stress in Rettungsdienst-Einsätzen bei Kindernotfällen empfinde ich als...“                               | "My perceived stress at rescue missions with pediatric emergencies, I sense..."                                                     |
| Q10 |                                                                                                                                 | „Meinen gefühlten Stress beim Warten auf den Notarzt bei kritischen Patienten empfinde ich als...“                          | "My perceived stress at rescue missions while waiting for an emergency physician with a critical ill patient, I sense..."           |
| Q11 | Organisational framework                                                                                                        | „Meinen gefühlten Stress bei vermehrter Dienstbelastung durch einen hohen Krankenstand empfinde ich als...“                 | "My perceived stress through the burden of an increased number of duties caused by a high status of employee's illness, I sense..." |
| Q12 |                                                                                                                                 | „Meinen gefühlten Stress im Rettungsdienst-Einsatz im Schichtdienst empfinde ich als...“                                    | "My perceived stress at rescue missions during shift work, I sense..."                                                              |
| Q13 |                                                                                                                                 | „Meinen gefühlten Stress bei Alarmfahrten von Kollegen mit geringer Fahrpraxis empfinde ich als...“                         | "My perceived stress at emergency drives with colleagues having limited driving experience, I sense..."                             |
| Q14 |                                                                                                                                 | „Meinen gefühlten Stress in Rettungsdienst-Einsätzen bei fehlender Erholungszeit nach Nachtdiensten empfinde ich als...“    | "My perceived stress at rescue missions and missing recovery time after night shift, I sense..."                                    |
| Q15 |                                                                                                                                 | „Meinen gefühlten Stress in Rettungsdienst-Einsätzen kurz vor Dienstende empfinde ich als...“                               | "My perceived stress at rescue missions short before end of shift, I sense..."                                                      |
| Q16 |                                                                                                                                 | „Meinen gefühlten Stress bei mehreren Nachtdiensten in Folge empfinde ich als...“                                           | "My perceived stress at rescue missions at several night shifts in a row, I sense..."                                               |
| Q17 |                                                                                                                                 | Personal vulnerability                                                                                                      | „Meinen gefühlten Stress im Rettungsdienst-Einsatz beim Tod junger Patienten empfinde ich als...“                                   |
| Q18 | „Meinen gefühlten Stress bei verbalen Angriffen auf das Rettungsdienstpersonal in Rettungsdienst-Einsätzen empfinde ich als...“ |                                                                                                                             | "My perceived stress at verbal attacks against EMS personnel during rescue missions, I sense..."                                    |
| Q19 | „Meinen gefühlten Stress in Rettungsdienst-Einsätzen mit aggressiven Patienten oder Angehörigen empfinde ich als...“            |                                                                                                                             | "My perceived stress at rescue missions with aggressive patients or family members, I sense..."                                     |
| Q20 | Team performance                                                                                                                | „Meinen gefühlten Stress unangemessenen Reaktionen von Kollegen in Rettungsdienst-Einsätzen empfinde ich als...“            | "My perceived stress at inadequate reactions of colleagues during rescue missions, I sense..."                                      |
| Q21 |                                                                                                                                 | „Meinen gefühlten Stress in Rettungsdienst-Einsätzen bei der Zusammenarbeit mit unmotivierten Kollegen empfinde ich als...“ | "My perceived stress at rescue missions teamworking with unmotivated colleagues, I sense..."                                        |

|     |                     |                                                                                                                                           |                                                                                                                          |
|-----|---------------------|-------------------------------------------------------------------------------------------------------------------------------------------|--------------------------------------------------------------------------------------------------------------------------|
| Q22 |                     | „Meinen gefühlten Stress beim möglichen Vergessen eines wichtigen Versorgungsschrittes in Rettungsdienstesätzen empfinde ich als...“      | "My perceived stress at potentially missing a critical step dealing with rescue missions, I sense..."                    |
| Q23 | Expectations        | „Meinen gefühlten Stress im Rettungsdienstesatz bei hoher Erwartungshaltung der Patienten bei Bagatellen empfinde ich als...“             | "My perceived stress at rescue missions with high expectations of patients with bagatelles, I sense..."                  |
| Q24 |                     | „Meinen gefühlten Stress in Rettungsdienstesätzen bei der Diskussion mit Ärzten und Pflegepersonal in Krankenhäusern empfinde ich als...“ | "My perceived stress at rescue missions with discussion with physicians and nurses in emergency departments, I sense..." |
| Q25 | Question of meaning | „Meinen gefühlten Stress bei unnötigen Rettungsdienstesätzen empfinde ich als...“                                                         | "My perceived stress at unnecessary rescue missions, I sense..."                                                         |
