# Supplementary material for: Structured evaluation of stress triggers in prehospital emergency medical care
Source: Springer Nature journal article supplement (doi:10.1007/s00101-021-00968-x), 2021-05-11
Supplement: MOESM2 [file 19154180]

**Additional material to „Structured evaluation of stress trigger in prehospital medical care. An analysis by questionnaire regarding the professional groups”.**

**Eismann H., Sieg L., Palmaers T. et al. (2021) in *Der Anaesthetist*.**

Article and supplementary material are available at [www.springermedizin.de](http://www.springermedizin.de). Please enter the title of the article in the search field

**Stress factors of the professional group Advanced paramedic (“Notfallsanitäter”)**

| Item number | Scale                    | Original item text (German)                                                                                                                     | Translated item text (English)                                                                                   |
|-------------|--------------------------|-------------------------------------------------------------------------------------------------------------------------------------------------|------------------------------------------------------------------------------------------------------------------|
| Q1          | Professional uncertainty | „Meinen gefühlten Stress im Rettungsdiensteinsatz bei fehlender Routine oder ungenügendem Training empfinde ich als...“                         | "My perceived stress at rescue missions with lack of routine or insufficient training, I sense..."               |
| Q2          |                          | „Meinen gefühlten Stress im Rettungsdiensteinsatz bei individueller und nicht-leitliniengerechter Versorgung von Patienten empfinde ich als...“ | "My perceived stress at rescue missions with non-guideline compliant care, I sense..."                           |
| Q3          |                          | „Meinen gefühlten Stress im Rettungsdiensteinsatz bei Unkenntnis bei der Bedienung medizinischer Geräte empfinde ich als...“                    | "My perceived stress at rescue missions and lack of knowledge of medical equipment, I sense..."                  |
| Q4          |                          | „Meinen gefühlten Stress im Rettungsdiensteinsatz bei der Durchführung von ungeübten Maßnahmen unter Zeitdruck empfinde ich als...“             | "My perceived stress at rescue missions and application of untrained procedures under time pressure, I sense..." |
| Q5          |                          | „Meinen gefühlten Stress im Rettungsdiensteinsatz bei der Anwendung von seltenen/ neuen Maßnahmen empfinde ich als...“                          | "My perceived stress at rescue missions and the execution of rare or new procedures, I sense..."                 |
| Q6          |                          | „Meinen gefühlten Stress im Rettungsdiensteinsatz bei eigener Unsicherheit empfinde ich als...“                                                 | "My perceived stress at rescue missions and personal uncertainty, I sense..."                                    |
| Q7          |                          | „Meinen gefühlten Stress im Rettungsdiensteinsatz beim Gefühl von Kontrollverlust im Einsatz empfinde ich als...“                               | "My perceived stress at rescue missions with a feeling of a loss of control, I sense..."                         |
| Q8          | Team performance         | „Meinen gefühlten Stress im Rettungsdiensteinsatz, wenn ältere Kollegen alles bagatellisieren, empfinde ich als...“                             | "My perceived stress at rescue missions when older colleagues trivialize everything, I sense..."                 |
| Q9          |                          | „Meinen gefühlten Stress bei der Zusammenarbeit mit schwierigen Teammitgliedern im Rettungsdiensteinsatz empfinde ich als...“                   | "My perceived stress while working together with difficult team members at rescue missions, I sense..."          |
| Q10         |                          | „Meinen gefühlten Stress bei unstrukturierten Übergaben/                                                                                        | "My perceived stress while unstructured handover situation at hospitals, I sense..."                             |

|     |                           |                                                                                                                                                                                                                    |                                                                                                                                                              |
|-----|---------------------------|--------------------------------------------------------------------------------------------------------------------------------------------------------------------------------------------------------------------|--------------------------------------------------------------------------------------------------------------------------------------------------------------|
|     |                           | Übernahmen in Kliniken empfinde ich als...“                                                                                                                                                                        |                                                                                                                                                              |
| Q11 |                           | „Meinen gefühlten Stress im Rettungsdienstinsatz bei fehlendem Team Resource Management empfinde ich als...“                                                                                                       | "My perceived stress at rescue missions with missing team resource management, I sense..."                                                                   |
| Q12 |                           | „Meinen gefühlten Stress im Rettungsdienstinsatz bei schlechter Kommunikation im Team empfinde ich als...“                                                                                                         | "My perceived stress at rescue missions with poor team communication, I sense..."                                                                            |
| Q13 |                           | „Meinen gefühlten Stress im Rettungsdienstinsatz bei fehlender Zusammenarbeit auf Augenhöhe empfinde ich als...“                                                                                                   | "My perceived stress at rescue missions with missing team working at eye level, I sense..."                                                                  |
| Q14 | Appreciation              | „Meinen gefühlten Stress bei fehlender Wertschätzung durch Vorgesetzte empfinde ich als...“                                                                                                                        | "My perceived stress at missing appreciation by superior, I sense..."                                                                                        |
| Q15 |                           | „Meinen gefühlten Stress im Rettungsdienstinsatz mit Notärzten, die die Kompetenz des Rettungsdienstpersonals unterschätzen empfinde ich als...“                                                                   | "My perceived stress at rescue missions with EMS-physicians that underestimate the competence of EMS personnel, I sense..."                                  |
| Q16 |                           | „Meinen gefühlten Stress im Rettungsdienstinsatz, wenn die Schnittstelle Krankenhaus auf einem schlechteren fachlichen Niveau arbeitet empfinde ich als...“                                                        | "My perceived stress at rescue missions with a hospital interface working on a poor professional level, I sense..."                                          |
| Q17 |                           | „Meinen gefühlten Stress im Rettungsdienstinsatz, wenn Notärzte vom Standard abweichen empfinde ich als...“                                                                                                        | "My perceived stress at rescue missions with EMS-physicians deviate from standards, I sense..."                                                              |
| Q18 |                           | „Meinen gefühlten Stress im Rettungsdienstinsatz bei ignorantem Auftreten anderer empfinde ich als: ...“                                                                                                           | "My perceived stress at rescue missions with ignorant behavior of others, I sense..."                                                                        |
| Q19 |                           | „Meinen gefühlten Stress beim sich gegenüber Klinikpersonal rechtfertigen-müssen im Rettungsdienstinsatz empfinde ich als...“                                                                                      | "My perceived stress at rescue missions while explaining myself as against the hospital personnel, I sense..."                                               |
| Q20 | Exceptional circumstances | „Meinen gefühlten Stress bei der Anwendung von chirurgischem Atemwegmanagement (Koniotomie) im Rettungsdienstinsatz empfinde ich als...“                                                                           | "My perceived stress at performing surgical airways (cricothyrotomy) during rescue missions, I sense..."                                                     |
| Q21 |                           | „Meinen gefühlten Stress im Rettungsdienstinsatz bei komplexen Einsatzsituationen empfinde ich als...“                                                                                                             | "My perceived stress at rescue missions with complex settings, I sense..."                                                                                   |
| Q22 | Legal certainty           | „Meinen gefühlten Stress im Rettungsdienstinsatz bei komplexen Einsatzsituationen mit der Notwendigkeit einer sofortigen medikamentösen Intervention ohne ausreichende rechtliche Absicherung empfinde ich als...“ | "My perceived stress in complex rescue mission situations with the need of urgent pharmacological treatment without sufficient legal protection, I sense..." |
| Q23 |                           | „Meinen gefühlten Stress im Rettungsdienstinsatz bei rechtlichen                                                                                                                                                   | "My perceived stress at rescue missions with legal concerns during the care of patients, I sense..."                                                         |

|     |                        |                                                                                                                                  |                                                                                                           |
|-----|------------------------|----------------------------------------------------------------------------------------------------------------------------------|-----------------------------------------------------------------------------------------------------------|
|     |                        | Bedenken bei der Versorgung von Patienten empfinde ich als..."                                                                   |                                                                                                           |
| Q24 | Personal vulnerability | „Meinen gefühlten Stress bei Angriffen auf das Team von Patienten oder Angehörigen im Rettungsdiensteinsatz empfinde ich als..." | "My perceived stress when patients or their relatives attack the team during rescue missions, I sense..." |
