# Supplementary material for: Structured evaluation of stress triggers in prehospital emergency medical care
Source: Springer Nature journal article supplement (doi:10.1007/s00101-021-00968-x), 2021-05-11
Supplement: MOESM3 [file 19154180]

**Additional material to „Structured evaluation of stress trigger in prehospital medical care. An analysis by questionnaire regarding the professional groups”.**

**Eismann H., Sieg L., Palmaers T. et al. (2021) in *Der Anaesthetist*.**

Article and supplementary material are available at [www.springermedizin.de](http://www.springermedizin.de). Please enter the title of the article in the search field.

**Stress factors of the professional group EMS-physician (“Notarzt”)  
(EMS: emergency medical service)**

| Item number | Scale                  | Original item text (German)                                                                                                                                | Translated item text (English)                                                                                           |
|-------------|------------------------|------------------------------------------------------------------------------------------------------------------------------------------------------------|--------------------------------------------------------------------------------------------------------------------------|
| Q1          | Pressure to act        | „Meinen gefühlten Stress bei Rettungsdiensteinsätzen, die komplexe Handlungen oder Planungen notwendig machen empfinde ich als: ...“                       | "My perceived stress at rescue missions which needs complex tasks or planning, I sense..."                               |
| Q2          |                        | „Meinen gefühlten Stress im Rettungsdiensteinsatz bei drohendem Verlust der Übersicht von komplexen Gesamtsituationen empfinde ich als: ...“               | "My perceived stress at rescue missions when faced with the threat of losing overview of complex situations, I sense..." |
| Q3          |                        | „Meinen gefühlten Stress bei unübersichtlichen Situationen im Rettungsdiensteinsatz empfinde ich als: ...“                                                 | "My perceived stress at rescue missions with confusing situations, I sense..."                                           |
| Q4          |                        | „Meinen gefühlten Stress im Rettungsdiensteinsatz bei der Entscheidung für oder gegen eine Intubation in Grenzfällen empfinde ich als: ...“                | "My perceived stress at rescue missions with borderline decisions for or against an intubation, I sense..."              |
| Q5          |                        | „Meinen gefühlten Stress im Rettungsdiensteinsatz bei Patienten in akuter Lebensgefahr empfinde ich als: ...“                                              | "My perceived stress at rescue missions with patients in acute life-threatening situations, I sense..."                  |
| Q6          |                        | „Meinen gefühlten Stress im Rettungsdiensteinsatz bei Kindernotfällen oder kindlichen Traumata empfinde ich als: ...“                                      | "My perceived stress at rescue missions with pediatric emergencies or pediatric trauma, I sense..."                      |
| Q7          |                        | „Meinen gefühlten Stress im Rettungsdiensteinsatz bei Großschadenslagen empfinde ich als: ...“                                                             | "My perceived stress at rescue missions in mass-casualty incidents, I sense..."                                          |
| Q8          | Handling third parties | „Meinen gefühlten Stress bei Übergabegesprächen an ältere oder "klugscheißende" Kollegen in Aufnahmeklinik im Rettungsdiensteinsatz empfinde ich als: ...“ | "My perceived stress during handover to older or “smart-ass” colleagues in the emergency department, I sense..."         |
| Q9          |                        | „Meinen gefühlten Stress im Rettungsdiensteinsatz bei der Diskussion mit nicht-aufnahmewilligen Kliniken empfinde ich als: ...“                            | "My perceived stress at rescue missions with discussions of hospitals not willing to admit, I sense..."                  |

|     |                          |                                                                                                                                                                                                                              |                                                                                                                                                                                                                 |
|-----|--------------------------|------------------------------------------------------------------------------------------------------------------------------------------------------------------------------------------------------------------------------|-----------------------------------------------------------------------------------------------------------------------------------------------------------------------------------------------------------------|
| Q10 |                          | „Meinen gefühlten Stress im Rettungsdienstinsatz bei der Unterwanderung der eigenen Entscheidungen durch Rettungsdienstpersonal empfinde ich als: ...“                                                                       | "My perceived stress at rescue missions with subverting my decisions by EMS personnel, I sense..."                                                                                                              |
| Q11 |                          | „Meinen gefühlten Stress bei der Fremdscham bei inadäquat reagierendem Rettungsdienstpersonal im Rettungsdienstinsatz empfinde ich als: ...“                                                                                 | "My perceived stress at rescue missions with feeling embarrassed on behalf of inadequately acting EMS personnel, I sense..."                                                                                    |
| Q12 |                          | „Meinen gefühlten Stress im Rettungsdienstinsatz bei unprofessionellem Ton des Notaufnahmepersonal empfinde ich als: ...“                                                                                                    | "My perceived stress at rescue missions with unprofessional behavior of emergency department personnel, I sense..."                                                                                             |
| Q13 | Team performance         | „Meinen gefühlten Stress im Rettungsdienstinsatz mit jüngeren Kollegen auf einem schlechten Ausbildungsstand empfinde ich als: ...“                                                                                          | "My perceived stress at rescue missions with young colleagues on a poor training level, I sense..."                                                                                                             |
| Q14 |                          | „Meinen gefühlten Stress im Rettungsdienstinsatz bei vermehrtem Arbeiten mit unerfahrenen Kollegen, die streng supervidiert werden müssen, empfinde ich als: ...“                                                            | "My perceived stress at rescue missions with inexperienced colleagues who have to be strictly supervised, I sense..."                                                                                           |
| Q15 |                          | „Meinen gefühlten Stress im Rettungsdienstinsatz mit schlecht ausgebildetem Rettungsdienstpersonal empfinde ich als: ...“                                                                                                    | "My perceived stress at rescue missions with poorly trained EMS personnel, I sense..."                                                                                                                          |
| Q16 | Organisational framework | „Meinen gefühlten Stress im Rettungsdienstinsatz bei Fremdbestimmung durch organisatorische Mängel empfinde ich als: ...“                                                                                                    | "My perceived stress at rescue missions with heteronomy due to organizational deficiencies, I sense..."                                                                                                         |
| Q17 |                          | „Meinen gefühlten Stress bei der Zwangseinweisung nach PsychKG im Rettungsdienstinsatz empfinde ich als: ...“                                                                                                                | "My perceived stress at rescue missions with the involuntary admission of psychiatric patients, I sense..."                                                                                                     |
| Q18 |                          | „Meinen gefühlten Stress im Rettungsdienstinsatz bei zunehmender Zahl von Einsätzen pro Schicht empfinde ich als: ...“                                                                                                       | "My perceived stress at rescue missions with increasing numbers of missions per shift, I sense..."                                                                                                              |
| Q19 |                          | „Meinen gefühlten Stress im Rettungsdienstinsatz bei unklaren Kompetenzen (z.B. Notaufnahmearzt will Verlegung in das Krankenhaus, als Notarzt ist man mit der Entscheidung aber nicht einverstanden) empfinde ich als: ...“ | "My perceived stress at rescue missions with unclear competences (e.g. physician of an emergency department wants a transfer to another hospital – EMS-physician does not agree with the decision), I sense..." |
| Q20 |                          | „Meinen gefühlten Stress im Rettungsdienstinsatz bei der Diagnose einer Todesursache, wenn keine weiteren Informationen vorliegen empfinde ich als: ...“                                                                     | "My perceived stress at rescue missions in diagnosing a cause of death without further information, I sense..."                                                                                                 |
| Q21 | Tolerance to ambiguity   | „Meinen gefühlten Stress im Rettungsdienstinsatz bei korrektem Umgang mit gestresstem                                                                                                                                        | "My perceived stress at rescue missions when dealing with stressed emergency department professionals,                                                                                                          |

|     |                 |                                                                                                                                                        |                                                                                                                                                |
|-----|-----------------|--------------------------------------------------------------------------------------------------------------------------------------------------------|------------------------------------------------------------------------------------------------------------------------------------------------|
|     |                 | Notaufnahmepersonal ohne "selbst aus der Haut zu fahren" empfinde ich als: ..."                                                                        | without losing one's patience, I sense..."                                                                                                     |
| Q22 |                 | „Meinen gefühlten Stress im Rettungsdiensteinsatz bei aufgebrachten Angehörigen empfinde ich als: ...“                                                 | "My perceived stress at rescue missions with furious relatives, I sense..."                                                                    |
| Q23 | Task management | „Meinen gefühlten Stress im Rettungsdiensteinsatz mit einem Teamleiter (z.B. Notarzt) ohne erkennbaren oder kommunizierten Plan empfinde ich als: ...“ | "My perceived stress at rescue missions with a team leader (e.g. emergency physician) without a recognizable or communicated plan, I sense..." |
| Q24 |                 | „Meinen gefühlten Stress im Rettungsdiensteinsatz mit unübersichtlicher Aufgabenverteilung empfinde ich als: ...“                                      | "My perceived stress at rescue missions with unclear task management, I sense..."                                                              |
